# Supplementary material for: iso-Propylthiobiuret-copper and indium complexes as novel precursors for colloidal synthesis of CuInS2 nanoparticles
Source: Royal Society of Chemistry journal article supplement (doi:10.1039/c2jm15460a), 2012-01-01
Supplement: c2jm15460a.pdf [file c2jm15460a.pdf]

## Supplementary data for

# *iso*-Propylthiobiureato- Copper and Indium Complexes as Novel Precursors for Colloidal Synthesis of CuInS<sub>2</sub> Nanoparticles

*Ahmed Lutfi Abdelhady, Mohammad A. Malik, Paul O'Brien\**

School of Chemistry and School of Materials, The University of Manchester, Oxford Road,  
Manchester, M13 9PL, UK.

EMAIL: [paul.obrien@manchester.ac.uk](mailto:paul.obrien@manchester.ac.uk)

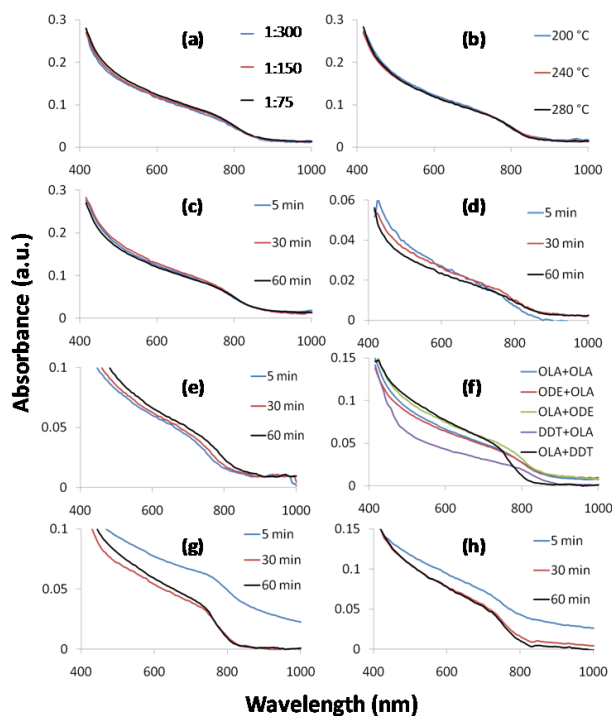

**Fig. S1.** UV-Vis spectra of (a) different precursors to OLA ratios (CIS1, CIS2 & CIS3), (b) different growth temperature (CIS2, CIS4 & CIS5), (c-e) CIS2, CIS1 & CIS4 analysed during the reaction at different time intervals to monitor the progress of reaction (f) different capping agents (CIS2, CIS6, CIS7, CIS8 and CIS9), (g & h) CIS9, CIS8 samples analysed at different time intervals during reaction.
